# Supplementary material for: Hepatocellular Carcinoma with Gastrointestinal Involvement: A Systematic Review
Source: MDPI journal article supplement (doi:10.3390/diagnostics12051270), 2022-05-19
Supplement: s1 [file s1]

Risk of bias was assessed by the Joanna Briggs Institute critical appraisal tools for case reports and case series.

**A. JBI Critical Appraisal Checklist for case reports.**

- Q1. Were patient's demographic characteristics clearly described?
- Q2. Was the patient's history clearly described and presented as a timeline?
- Q3. Was the current clinical condition of the patient on presentation clearly described?
- Q4. Were diagnostic tests or assessment methods and the results clearly described?
- Q5. Was the intervention(s) or treatment procedure(s) clearly described?
- Q6. Was the post-intervention clinical condition clearly described?
- Q7. Were adverse events (harms) or unanticipated events identified and described?
- Q8. Does the case report provide takeaway lessons?

**B. JBI Critical Appraisal Checklist for case series**

- Q1. Were there clear criteria for inclusion in the case series?
- Q 2. Was the condition measured in a standard, reliable way for all participants included in the case series?
- q3. Were valid methods used for identification of the condition for all participants included in the case series?
- Q 4. Did the case series have consecutive inclusion of participants?
- Q 5. Did the case series have complete inclusion of participants?
- Q 6. Was there clear reporting of the demographics of the participants in the study?
- Q7. Was there clear reporting of clinical information of the participants?
- Q 8. Were the outcomes or follow up results of cases clearly reported?
- Q 9. Was there clear reporting of the presenting site(s)/clinic(s) demographic information?
- Q 10. Was statistical analysis appropriate?

*Note: Moola S, Munn Z, Tufanaru C, Aromataris E, Sears K, Sfetcu R, Currie M, Qureshi R, Mattis P, Lisy K, Mu P-F. Chapter 7: Systematic reviews of etiology and risk. In: Aromataris E, Munn Z (Editors). Joanna Briggs Institute Reviewer's Manual. The Joanna Briggs Institute, 2017. Available*

*<https://jbi.global/critical-appraisal-tools>*

**Table S3. Methodological quality of included case reports using JBI Critical Appraisal Checklist for case reports.**

| Author                    | Q1  | Q2      | Q3      | Q4      | Q5      | Q6      | Q7  | Q8  |
|---------------------------|-----|---------|---------|---------|---------|---------|-----|-----|
| Sohn D et al.<br>[19]     | yes | yes     | yes     | unclear | N/A     | no      | yes | yes |
| Hiraoka T et al<br>[20]   | yes | No      | yes     | yes     | yes     | no      | yes | yes |
| Kume K et al<br>[21]      | yes | unclear | no      | yes     | yes     | yes     | yes | yes |
|                           | yes | yes     | yes     | yes     | N/A     | N/A     | yes | yes |
| Sohara N et al.<br>[22]   | yes | yes     | yes     | yes     | N/A     | N/A     | yes | yes |
| Tsubouchi E<br>[23]       | yes | yes     | yes     | yes     | yes     | yes     | yes | yes |
|                           | yes | yes     | yes     | yes     | yes     | yes     | yes | yes |
| Yan SL et al<br>[24]      | yes | unclear | yes     | yes     | yes     | yes     | yes | yes |
| Xie LY [25]               | yes | yes     | yes     | yes     | yes     | yes     | yes | yes |
| Choi CS et al<br>[26]     | yes | yes     | yes     | yes     | unclear | no      | yes | yes |
| Hsu KF et al.<br>[27]     | yes | yes     | yes     | yes     | unclear | unclear | yes | yes |
| Kahn J et al<br>[28]      | yes | yes     | yes     | yes     | yes     | no      | yes | yes |
| Boonnuch W<br>et al. [29] | yes | unclear | yes     | yes     | yes     | yes     | yes | yes |
| Skurla B et al.<br>[30]   | yes | yes     | yes     | yes     | yes     | unclear | yes | yes |
| Fukatsu H [31]            | yes | yes     | unclear | yes     | yes     | unclear | yes | yes |
| Chen JX et al<br>[32]     | yes | yes     | yes     | yes     | N/A     | N/A     | yes | yes |
| Harada JL et<br>al [12]   | yes | yes     | yes     | yes     | yes     | yes     | yes | yes |
| Kongkam P et<br>al [33]   | yes | no      | no      | yes     | no      | no      | yes | yes |

|                            |     |         |         |     |     |         |     |     |
|----------------------------|-----|---------|---------|-----|-----|---------|-----|-----|
| Boinboire R et al. [34]    | yes | yes     | yes     | yes | yes | yes     | yes | yes |
|                            | yes | yes     | yes     | yes | yes | yes     | yes | yes |
| Subramanian SK et al. [35] | yes | yes     | unclear | yes | yes | no      | yes | yes |
| Shiota T et al [36]        | yes | yes     | yes     | yes | N/A | N/A     | yes | yes |
| Makino H et al. [37]       | yes | no      | yes     | yes | yes | unclear | yes | yes |
| De Nardi P et al . [38]    | yes | yes     | yes     | yes | yes | yes     | yes | yes |
| Nicoll AJ et al [39]       | yes | yes     | yes     | yes | yes | yes     | yes | yes |
| Maruyama A et al. [40]     | yes | yes     | yes     | yes | yes | yes     | yes | yes |
| Srivastava DN et al [41]   | yes | no      | yes     | yes | yes | yes     | yes | yes |
| Srivastava DN et al [41]   | yes | no      | no      | yes | yes | yes     | yes | yes |
| Srivastava DN et al [341]  | yes | unclear | unclear | yes | yes | yes     | yes | yes |
| Wang MH et al. [37]        | yes | yes     | yes     | yes | yes | no      | yes | yes |
| Wang MH et al. [42]        | yes | yes     | yes     | yes | N/A | N/A     | yes | yes |
| Fujii K et al. [9]         | yes | yes     | unclear | yes | yes | yes     | yes | yes |
| Inoue H et al. [43]        | yes | yes     | yes     | yes | yes | yes     | yes | yes |
| Ong JC et al. [44]         | yes | yes     | yes     | yes | yes | yes     | yes | yes |
| Kimura K et al [45]        | yes | yes     | yes     | yes | yes | yes     | yes | yes |
| Korkolis DP et al. [46]    | yes | yes     | yes     | yes | yes | yes     | yes | yes |
| Park H et al. [48]         | yes | yes     | yes     | yes | yes | yes     | yes | yes |
| Tan WJ et al. [49]         | yes | yes     | yes     | yes | yes | yes     | yes | yes |
| Sayana H et al [50]        | yes | yes     | yes     | yes | yes | yes     | yes | yes |

|                                      |     |         |         |         |         |         |     |     |
|--------------------------------------|-----|---------|---------|---------|---------|---------|-----|-----|
| Okay E et al.<br>[51]                | yes | unclear | unclear | yes     | yes     | yes     | yes | yes |
| Inagaki Y et al.<br>[52]             | yes | yes     | unclear | yes     | yes     | unclear | yes | yes |
| Wu WD et al.<br>[53]                 | yes | yes     | yes     | yes     | yes     | no      | yes | yes |
| Grover I et al.<br>[54]              | yes | yes     | yes     | yes     | yes     | no      | yes | yes |
| Li L et al. [55]                     | yes | yes     | yes     | yes     | yes     | unclear | yes | yes |
| Hot S et al.<br>[56]                 | yes | unclear | yes     | yes     | yes     | yes     | yes | yes |
| Haruki K et al.<br>[57]              | yes | no      | unclear | yes     | yes     | yes     | yes | yes |
| Wu D et al.<br>[58]                  | yes | unclear | yes     | unclear | yes     | no      | yes | yes |
| Abdul Hakim<br>MS et al. [59]        | yes | yes     | yes     | yes     | yes     | yes     | yes | yes |
| Peng L et al.<br>[60]                | yes | yes     | yes     | yes     | yes     | yes     | yes | yes |
| Kasi M et al.<br>[61]                | yes | yes     | unclear | yes     | yes     | yes     | yes | yes |
| Sakumura M<br>et al. [62]            | yes | yes     | unclear | yes     | unclear | no      | yes | yes |
| Bale A et al.<br>[63]                | yes | no      | unclear | yes     | N/A     | N/A     | yes | yes |
| Imai M et al.<br>[64]                | yes | unclear | unclear | yes     | yes     | yes     | yes | yes |
| Marques da<br>Costa P et al.<br>[65] | yes | unclear | yes     | yes     | yes     | unclear | yes | yes |
| Kim R et al.<br>[66]                 | yes | yes     | yes     | yes     | yes     | yes     | yes | yes |
| Abouzied MM<br>et al. [67]           | yes | yes     | yes     | yes     | yes     | unclear | yes | yes |
| Eskarous H et<br>al. [68]            | yes | yes     | unclear | yes     | no      | no      | yes | yes |
| Arima K et al.<br>[69]               | yes | yes     | yes     | yes     | yes     | unclear | yes | yes |
| Moriura S et<br>al. [70]             | yes | yes     | unclear | yes     | yes     | yes     | yes | yes |
| Okusaka T et<br>al. [71]             | yes | unclear | yes     | yes     | yes     | yes     | yes | yes |

|                          |     |         |         |     |         |         |     |     |
|--------------------------|-----|---------|---------|-----|---------|---------|-----|-----|
| Hung HC et al. [72]      | yes | yes     | yes     | yes | yes     | yes     | yes | yes |
| Farell R et al. [73]     | yes | yes     | yes     | yes | yes     | yes     | yes | yes |
| Del Natale M et al. [74] | yes | yes     | yes     | yes | no      | N/A     | yes | yes |
| Cho A et al. [75]        | yes | unclear | yes     | yes | yes     | yes     | yes | yes |
| Ohnishi S et al. [76]    | yes | yes     | yes     | yes | yes     | yes     | yes | yes |
| Uehara K et al. [77]     | yes | unclear | yes     | yes | yes     | yes     | yes | yes |
| Chung C et al. [78]      | yes | yes     | yes     | yes | yes     | no      | yes | yes |
| Kurtz LE et al. [79]     | yes | yes     | unclear | yes | yes     | no      | yes | yes |
| Lin TL et al. [10]       | yes | yes     | unclear | yes | yes     | yes     | yes | yes |
|                          | yes | yes     | unclear | yes | yes     | yes     | yes | yes |
| Kato Y et al [11]        | yes | unclear | unclear | yes | yes     | yes     | yes | no  |
| Kim JN et al. [81]       | yes | yes     | yes     | yes | yes     | yes     | yes | yes |
| Sauer BG et al. [82]     | yes | yes     | unclear | yes | yes     | unclear | yes | yes |
| Arima K et al [83]       | yes | unclear | no      | yes | yes     | no      | yes | yes |
| Kashani A et al. [84]    | yes | yes     | unclear | yes | yes     | unclear | yes | yes |
| Lin IC [85]              | yes | yes     | unclear | yes | no      | no      | yes | yes |
| Ito T et al. [86]        | yes | yes     | yes     | yes | yes     | yes     | yes | yes |
| Liu YH et al. [87]       | yes | yes     | unclear | yes | yes     | yes     | yes | yes |
| Wu Yh ET al. [88]        | yes | unclear | yes     | yes | unclear | unclear | yes | yes |
| Sawada et al. [89]       | yes | unclear | unclear | yes | yes     | unclear | yes | yes |
| Tsuijomoto M et al. [91] | yes | yes     | yes     | yes | no      | no      | yes | yes |
| Narita T et al. [92]     | yes | yes     | no      | yes | unclear | no      | yes | yes |

|                         |     |         |         |     |     |         |     |     |
|-------------------------|-----|---------|---------|-----|-----|---------|-----|-----|
| Tanaka A et al. [93]    | yes | yes     | yes     | yes | yes | yes     | yes | yes |
| Byun JR et al. [94]     | yes | yes     | yes     | yes | yes | yes     | no  | yes |
| Kim HS et al. [95]      | yes | yes     | yes     | yes | yes | no      | yes | yes |
| Iwaki K et al. [96]     | yes | yes     | yes     | yes | yes | yes     | yes | yes |
| Choi JH et al. [97]     | yes | yes     | yes     | yes | yes | yes     | yes | yes |
| Kunizaki M et al. [98]  | yes | yes     | unclear | yes | yes | no      | yes | yes |
| Igawa A et al. [99]     | yes | unclear | yes     | yes | yes | yes     | yes | yes |
| Kanazawa M et al. [100] | yes | unclear | yes     | yes | no  | no      | yes | yes |
| Shelat VG et al. [101]  | yes | yes     | yes     | yes | yes | yes     | yes | yes |
| Sun WC et al. [102]     | yes | unclear | unclear | yes | no  | unclear | yes | yes |
| Mashiko T e al. [103]   | yes | yes     | yes     | yes | yes | yes     | yes | yes |
| Suzuki N et al. [104]   | yes | yes     | yes     | yes | yes | yes     | yes | yes |
| Fukui H et al. [105]    | yes | yes     | yes     | yes | no  | no      | yes | yes |
| Hashimoto M et al. [16] | yes | yes     | yes     | yes | yes | unclear | yes | yes |
| Cosenza CA et al. [106] | yes | yes     | yes     | yes | yes | yes     | yes | yes |
| Kurachi K et al. [107]  | yes | yes     | yes     | yes | yes | yes     | yes | yes |
| Zech CJ et al. [108]    | yes | yes     | yes     | yes | yes | no      | yes | yes |
| Tapuria N et al. [109]  | yes | yes     | yes     | yes | yes | no      | yes | yes |
| Kaibori M et al. [110]  | yes | yes     | unclear | yes | yes | no      | yes | yes |
| Ng DSC et al. [111]     | yes | yes     | yes     | yes | yes | yes     | yes | yes |

|                          |     |         |         |     |     |         |     |     |
|--------------------------|-----|---------|---------|-----|-----|---------|-----|-----|
| Hirashita T et al. [112] | yes | yes     | unclear | yes | yes | yes     | yes | yes |
|                          | yes | yes     | unclear | yes | yes | yes     | yes | yes |
| Nozaki Y et al. [113]    | yes | yes     | unclear | yes | no  | no      | yes | yes |
| Yoo DJ et al. [114]      | yes | yes     | unclear | yes | yes | no      | yes | yes |
| Huang SF et al. [115]    | yes | yes     | no      | yes | yes | no      | yes | yes |
| Shih YJ et al. [116]     | yes | no      | yes     | yes | yes | no      | yes | yes |
| Haga Y et al. [117]      | yes | yes     | yes     | yes | yes | yes     | yes | yes |
| Sun LH et al. [118]      | yes | yes     | yes     | yes | yes | yes     | yes | yes |
| Imada S et al. [119]     | yes | yes     | yes     | yes | yes | yes     | yes | yes |
| Ou TM et al. [120]       | yes | yes     | unclear | yes | yes | unclear | yes | yes |
| Kohli R et al. [121]     | yes | yes     | yes     | yes | yes | unclear | yes | yes |
| Zhu X et al. [122]       | yes | yes     | yes     | yes | yes | yes     | yes | yes |
| Mitsialis V et al. [123] | yes | yes     | yes     | yes | yes | no      | yes | yes |
| Repullo D et al. [124]   | yes | yes     | yes     | yes | yes | yes     | yes | yes |
| Tagliabue F et al. [125] | yes | unclear | yes     | yes | yes | yes     | yes | yes |
| Pham BV et al. [126]     | yes | yes     | yes     | yes | yes | no      | yes | yes |
| Soni A et al. [127]      | yes | yes     | yes     | yes | no  | no      | yes | yes |
|                          |     |         |         |     |     |         |     |     |
| YU YM et al. [13]        | yes | yes     | yes     | yes | yes | yes     | yes | yes |
| Mu M et al. [14]         | yes | yes     | yes     | yes | yes | yes     | yes | yes |
| Miyauchi et al. [128]    | yes | yes     | yes     | yes | yes | yes     | yes | yes |

|                         |     |         |     |     |     |         |     |     |     |
|-------------------------|-----|---------|-----|-----|-----|---------|-----|-----|-----|
| Liu KW et al. [129]     | yes | yes     | yes | yes | yes | yes     | yes | yes | yes |
| Nielsen JA et al. [130] | yes | unclear | yes | yes | yes | unclear | yes | yes | yes |
| Ikeda A [131]           | yes | yes     | no  | yes | yes | yes     | yes | yes | yes |

\*NA-not applicable

**Table S4. Methodological quality of included case series using JBI Critical Appraisal Checklist for case series.**

| Author               | Q1  | Q2  | Q3  | Q4      | Q5      | Q6  | Q7  | Q8      | Q9  | Q10 |
|----------------------|-----|-----|-----|---------|---------|-----|-----|---------|-----|-----|
| Chen LT et al. [6]   | yes | yes | yes | yes     | yes     | yes | yes | yes     | yes | yes |
| Lin CP et al. [7]    | yes | yes | yes | unclear | unclear | yes | yes | yes     | yes | yes |
| Park MS et al. [8]   | yes | yes | yes | yes     | no      | yes | yes | unclear | yes | yes |
| HU ML et al. [47]    | yes | yes | yes | unclear | yes     | yes | yes | no      | yes | yes |
| Liang JD et al. [80] | yes | yes | yes | yes     | yes     | yes | yes | yes     | yes | yes |
| Liu YJ et al. [90]   | yes | yes | yes | yes     | yes     | yes | no  | yes     | yes | yes |

\*N/A-not applicable
