# Supplementary material for: Hepatocellular Carcinoma with Gastrointestinal Involvement: A Systematic Review
Source: MDPI journal article supplement (doi:10.3390/diagnostics12051270), 2022-05-19
Supplement: s1 [file s1]

Table S2. Complete search strategy

| Name of<br>databse | Search strategy                                                                                                                                                                                                                | Number of<br>records |
|--------------------|--------------------------------------------------------------------------------------------------------------------------------------------------------------------------------------------------------------------------------|----------------------|
| PubMed             | ((("hepatocellular carcinoma") AND (esophagus* OR stomach* OR gastric* OR duodenum* OR jejunum* OR ileum* OR small bowel* OR colon* OR rectum*)) AND (invasion* OR metastasis*))                                               | 1940                 |
| Scopus             | TITLE-ABS-KEY ( "hepatocellular carcinoma" ) AND TITLE-ABS-KEY ( esophagus* OR stomach* OR gastric* OR duodenum* OR jejunum* OR ileum* OR "small bowel*" OR colon* OR rectum* ) AND TITLE-ABS-KEY ( invasion* OR metastasis* ) | 3209                 |
| Web of<br>Science  | ALL=("hepatocellular carcinoma*") AND ALL=(esophagus* OR stomach* OR gastric* OR duodenum* OR jejunum* OR ileum* OR small bowel* OR colon* OR rectum*) AND ALL=(invasion* OR metastasis*)                                      | 4325                 |
