# Supplementary material for: Hepatocellular Carcinoma with Gastrointestinal Involvement: A Systematic Review
Source: Diagnostics (Basel). 2022 May 19;12(5):1270. doi: 10.3390/diagnostics12051270 (PMC9140172; doi:10.3390/diagnostics12051270)
Supplement: Supplementary file 1 [file diagnostics-12-01270-s001.zip]

Archive with 4 entries (4 files):
- Supplementary file 1.PRISMA 2020 Checklist.pdf
- Supplementary file 2-Complete search strategy.pdf
- Supplementary file 3-4 Risk of bias assesment.pdf
- Supplementary file 5-List of relevant studies excluded from the review.pdf
